# Supplementary material
Source: Research Square preprint supplement (doi:10.21203/rs.3.rs-8959179/v1)
Supplement: Supplementary file 1 [file abc18ba84fac511af52b57d0.docx]

**Video Legends**

**Video 1.** Focused imaging of the infero-apical region in the apical two-chamber view revealed a left ventricular aneurysm, while the apical four-chamber view demonstrated an essentially normal cardiac structure. High-frequency ultrasound provided clear visualization of the infero-apical aneurysm, showing an irregular protrusion and a fragile wall measuring approximately 1 mm (arrow).

**Video 2.** In the apical two-chamber view, the focused infero-apical region demonstrated a left ventricular aneurysm, with the apical four-chamber view showing no significant structural abnormalities. High-frequency ultrasound revealed a thin-walled infero-apical aneurysm (arrow) with prominent myocardial trabeculation. The apical four-chamber high-frequency view demonstrated normal septo-apical myocardial thickness, and the thinnest segment of the aneurysm wall was comparable to the normal apical parietal pericardial thickness.

**Video 3.** The apical two-chamber view of the focused infero-apical region identified a left ventricular aneurysm, with the apical four-chamber view showing no significant abnormalities. High-frequency ultrasound demonstrated a thin-walled infero-apical aneurysm (arrow) with distinct myocardial trabeculation. The apical four-chamber high-frequency view revealed normal septo-apical myocardial thickness.
